# Supplementary material for: Anionic templating in a new layered bismuth tellurium oxychloride, Bi3Te4O10Cl5
Source: Royal Society of Chemistry journal article supplement (doi:10.1039/b927286k), 2010-01-01

Electronic Supplementary Information (ESI) for:

**Anionic templating in a new layered bismuth tellurium  
oxychloride,  $\text{Bi}_3\text{Te}_4\text{O}_{10}\text{Cl}_5$**

Min Kyung Kim, Vinna Jo, Dong Woo Lee, and Kang Min Ok\*

*Department of Chemistry, Chung-Ang University, Seoul, 156-756, Republic of Korea.*

\*Corresponding Author

Professor Kang Min Ok

*Fax: 82 2 825 4736; Tel: 82 2 820 5197; E-mail: kmok@cau.ac.kr*

- S1. Experimental and calculated powder X-ray diffraction patterns for  $\text{Bi}_3\text{Te}_4\text{O}_{10}\text{Cl}_5$
- S2. Thermogravimetric analysis diagram for  $\text{Bi}_3\text{Te}_4\text{O}_{10}\text{Cl}_5$
- S3. Infrared spectrum of  $\text{Bi}_3\text{Te}_4\text{O}_{10}\text{Cl}_5$

S1. Experimental and calculated powder X-ray diffraction patterns for  $\text{Bi}_3\text{Te}_4\text{O}_{10}\text{Cl}_5$

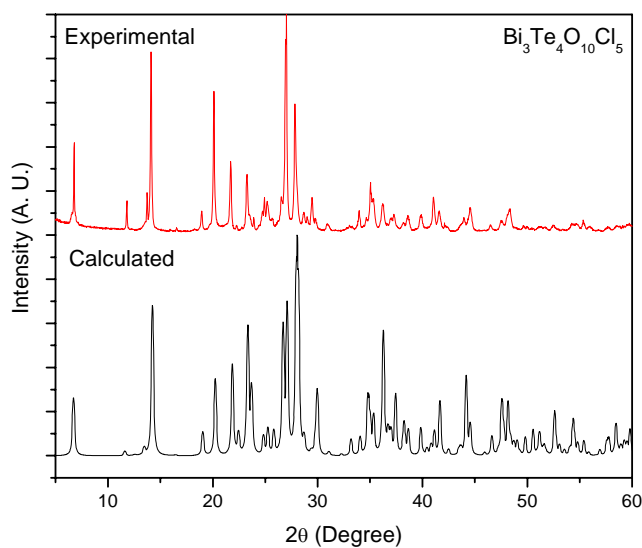

S2. Thermogravimetric analysis diagram for  $\text{Bi}_3\text{Te}_4\text{O}_{10}\text{Cl}_5$

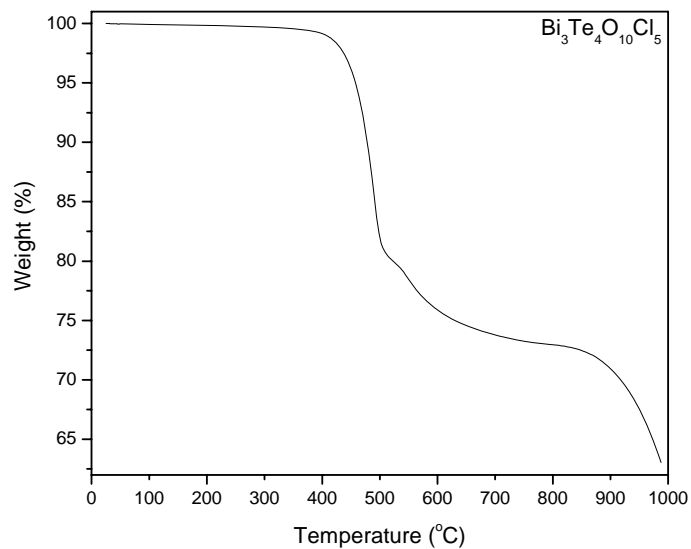

### S3. Infrared spectrum of $\text{Bi}_3\text{Te}_4\text{O}_{10}\text{Cl}_5$

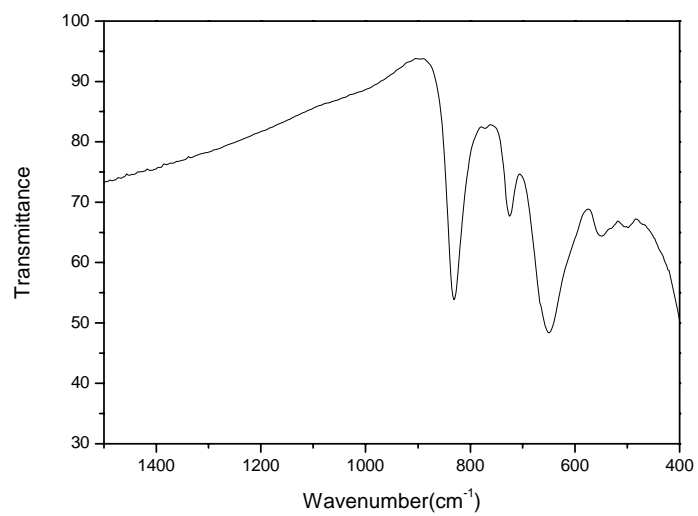

Supplement: b927286k.pdf [file b927286k.pdf]
